# Supplementary material for: Development of an adjoint model of GRAPES–CUACE and its application in tracking influential haze source areas in north China
Source: Copernicus journal article supplement (doi:10.5194/gmd-9-2153-2016), 2016-06-14
Supplement: Supplementary file 1 [file gmd-9-2153-2016-supplement.zip]

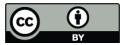

## *Supplement of*

# **Development of an adjoint model of GRAPES–CUACE and its application in tracking influential haze source areas in north China**

**Xing Qin An et al.**

*Correspondence to:* Xing Qin An ([anxq@camsma.cn](mailto:anxq@camsma.cn))

- [gmd-9-2153-2016-supplement-title-page.pdf](#)
- [supplement](#)
  - source files if needed
    - \* [GMD\\_supplement\\_figures\\_source\\_file.vsd](#)
    - \* [gmd-2015-69-Supplement.docx](#)
  - supplementary
    - \* [CUACE\\_ADJ\\_v1.0\\_20150611.zip](#)
    - \* [FigS1.png](#)
    - \* [FigS2.png](#)
    - \* [gmd-2015-69-Supplement.pdf](#)

The copyright of individual parts of the supplement might differ from the CC-BY 3.0 licence.
