# Supplementary material for: Development of an adjoint model of GRAPES–CUACE and its application in tracking influential haze source areas in north China
Source: Copernicus journal article supplement (doi:10.5194/gmd-9-2153-2016), 2016-06-14
Supplement: Supplementary file 1 [file gmd-2015-69-Supplement.docx]

1. **Structures of the GRAPES-CUACE aerosol module**

Figure S1 Structure of GRAPES-CUACE aerosol model. Dashed boxes are descriptions of each subroutine.

(a) Aerosol transport processes and the aerosol module main interface; (b) Shaded are interface subroutines (aerosol_driver, module_ae_cam and aeroexe1) and CAM; (c)Surface fluxes calculation module; (d) The aerosol physical and chemical processes section.

1. **Structures of theCUACE aerosol adjoint model**

Figure S2 Structure of the adjoint of GRAPES-CUACE aerosol model. (a): The adjoint structure of Fig. 1 (a); (b)The adjoint structure of Fig. 1 (b) and (d); (c): The adjoint structure of Fig. 1 (c).

In the GRAPES-CUACE aerosol model, ‘aerosol_driver’ is the main interface subroutine that connect GRAPES-Meso and CUACE. Both ‘aerosol_driver’ and the aerosol transport process subroutines are called by ‘solver_grapes’ (Figure 1(a)).

However, in developing the adjoint of CUACE aerosol model, ‘aerosol_driver’ acts as the main program. Aerosol transport processes, full and half level interpolation subroutines (‘ad_phy_prep’ and ‘ad_phy_post’) and the aerosol physics and chemical processes are all subroutines of ‘aerosol_driver’ (Figure 2 (a)).

The uneuilibrated variables are saved in checkpoint files at the beginning of each external time step during the forward integration. While for saving intermediate uneuilibrated variables, recalculation and stack storage (PUSH & POP) schemes are adopted. This type of two-level checkpointing strategy is similar to that used in the adjoint of GEOS-Chem and has been shown to optimally balance storage, memory and CPU requirements (Sandu et al., 2005; Henze et al., 2007).

1. **Forward and adjoint codes example**

Followings are two pieces of code from coagd.F (section 3.1; coagulation process) and coagd_ad.F (section 3.2; the adjoint of coagulation processes). In section 3.2, recalculation and stack storage schemes for intermediate uneuilibrated variables are shown.

- 1. **Forward code from coagd.F:**

DO I=1,ICOB

DO J=I,ICOB

DO L=1+MAE,ILEV

DO IL=IL1,IL2

C

C * DIFFUSION COEFFICIENTS

C

DIFFX=PDIFF(IL,L,I)

DIFFY=PDIFF(IL,L,J)

C

C * AIR'S DYNAMIC VISCOSITY

C

AMU=145.8*1.E-8*THROW(IL,L+1)**1.5/

1 (THROW(IL,L+1)+110.4)

DSUM=2.*(RHSIZE(IL,L,I)+RHSIZE(IL,L,J))

C

C BROWNIAN COAGULATION COEFFICIENT [V1, V2, VR - PARTICLE MASS, KG]

C

CBAR =SQRT(CBAR12(IL,L,I)+CBAR12(IL,L,J))

GMEAN=SQRT(GX(IL,L,I)+GX(IL,L,J))

BETA(IL,L,I,J)=6.2832*(DIFFX+DIFFY)*DSUM/(DSUM/(DSUM

1 +2.*GMEAN)+8.*(DIFFX+DIFFY)/

2 (CBAR*DSUM*STICK))

C

C ADD GRAVITATIONAL COAGULATION

C

BETA(IL,L,I,J)=BETA(IL,L,I,J)+0.7854*DSUM**2

1 *ABS(PDEPV(IL,L,I)-PDEPV(IL,L,J))

BETA(IL,L,J,I)=BETA(IL,L,I,J)

END DO

END DO

END DO

END DO

- 1. **Corresponding adjoint code from coagd_ad.F:**

C

C * DIFFUSION COEFFICIENTS

C

diffx = pdiff(il, l, i)

diffy = pdiff(il, l, j)

C

C * AIR'S DYNAMIC VISCOSITY

C

dsum = 2.*(rhsize(il, l, i)+rhsize(il, l, j))

CALL PUSHREAL8(cbar)

C

C BROWNIAN COAGULATION COEFFICIENT [V1, V2, VR - PARTICLE MASS, KG]

C

cbar = SQRT(cbar12(il, l, i) + cbar12(il, l, j))

CALL PUSHREAL8(gmean)

gmean = SQRT(gx(il, l, i) + gx(il, l, j))

C

beta(il, l, i, j) = 6.2832*(diffx+diffy)*dsum/(dsum/(

+ dsum+2.*gmean)+8.*(diffx+diffy)/(cbar*dsum*stick))

IF (pdepv(il, l, i) - pdepv(il, l, j) .GE. 0.) THEN

CALL PUSHREAL8(abs0)

abs0 = pdepv(il, l, i) - pdepv(il, l, j)

CALL PUSHCONTROL1B(0)

ELSE

CALL PUSHREAL8(abs0)

abs0 = -(pdepv(il, l, i)-pdepv(il, l, j))

CALL PUSHCONTROL1B(1)

END IF

C

C ADD GRAVITATIONAL COAGULATION

C

beta(il, l, i, j) = beta(il, l, i, j) + 0.7854*dsum**2*

+ abs0

tmp = beta(il, l, i, j)

beta(il, l, j, i) = tmp

ENDDO

ENDDO

ENDDO

CALL PUSHINTEGER4(ad_from)

ENDDO

DO i=icob,1,-1

CALL POPINTEGER4(ad_from)

DO j=icob,ad_from,-1

DO l=ilev,1+mae,-1

DO il=il2,il1,-1

tmpb = betab(il, l, j, i)

betab(il, l, j, i) = 0.0

betab(il, l, i, j) = betab(il, l, i, j) + tmpb

dsum = 2.*(rhsize(il, l, i)+rhsize(il, l, j))

dsumb = abs0*0.7854*2*dsum*betab(il, l, i, j)

abs0b = 0.7854*dsum**2*betab(il, l, i, j)

CALL POPCONTROL1B(branch)

IF (branch .EQ. 0) THEN

CALL POPREAL8(abs0)

pdepvb(il, l, i) = pdepvb(il, l, i) + abs0b

pdepvb(il, l, j) = pdepvb(il, l, j) - abs0b

ELSE

CALL POPREAL8(abs0)

pdepvb(il, l, j) = pdepvb(il, l, j) + abs0b

pdepvb(il, l, i) = pdepvb(il, l, i) - abs0b

END IF

diffx = pdiff(il, l, i)

diffy = pdiff(il, l, j)

temp8 = stick*cbar*dsum

temp7 = (diffx+diffy)/temp8

temp6 = dsum + 2.*gmean

temp5 = dsum/temp6 + 8.*temp7

temp5b = 6.2832*betab(il, l, i, j)/temp5

temp5b0 = -((diffx+diffy)*dsum*temp5b/temp5)

temp6b = -(dsum*temp5b0/temp6**2)

temp7b = 8.*temp5b0/temp8

temp8b = -(temp7*temp7b)

diffxb = temp7b + dsum*temp5b

diffyb = temp7b + dsum*temp5b

dsumb = dsumb + stick*cbar*temp8b + temp6b + temp5b0/

+ temp6 + (diffx+diffy)*temp5b

gmeanb = 2.*temp6b

cbarb = dsum*stick*temp8b

betab(il, l, i, j) = 0.0

CALL POPREAL8(gmean)

IF (gx(il, l, i) + gx(il, l, j) .EQ. 0.0) THEN

temp5b1 = 0.0

ELSE

temp5b1 = gmeanb/(2.0*SQRT(gx(il, l, i)+gx(il, l, j)))

END IF

gxb(il, l, i) = gxb(il, l, i) + temp5b1

gxb(il, l, j) = gxb(il, l, j) + temp5b1

CALL POPREAL8(cbar)

IF (cbar12(il, l, i) + cbar12(il, l, j) .EQ. 0.0) THEN

temp5b2 = 0.0

ELSE

temp5b2 = cbarb/(2.0*SQRT(cbar12(il, l, i)+cbar12(il,

+ l, j)))

END IF

cbar12b(il, l, i) = cbar12b(il, l, i) + temp5b2

cbar12b(il, l, j) = cbar12b(il, l, j) + temp5b2

rhsizeb(il, l, i) = rhsizeb(il, l, i) + 2.*dsumb

rhsizeb(il, l, j) = rhsizeb(il, l, j) + 2.*dsumb

pdiffb(il, l, j) = pdiffb(il, l, j) + diffyb

pdiffb(il, l, i) = pdiffb(il, l, i) + diffxb

ENDDO

ENDDO

ENDDO

ENDDO

References:

Sandu, A., Daescu, D., Carmichael, G. R., and Chai, T,:Adjoint sensitivity analysis of regional air quality models, J., Comput. Phys., 204, 222-252, 2005a.

Henze, D., Hakami, A., and Seinfeld, J.: Development of the adjoint of GEOS-Chem, Atmos. Chem. Phys., 7, 2413-2433, 2007.
