# Supplementary material for: Development of an adjoint model of GRAPES–CUACE and its application in tracking influential haze source areas in north China
Source: Copernicus journal article supplement (doi:10.5194/gmd-9-2153-2016), 2016-06-14
Supplement: Supplementary file 2 [file gmd-9-2153-2016-supplement.zip]

## 1. Structures of the GRAPES-CUACE aerosol module

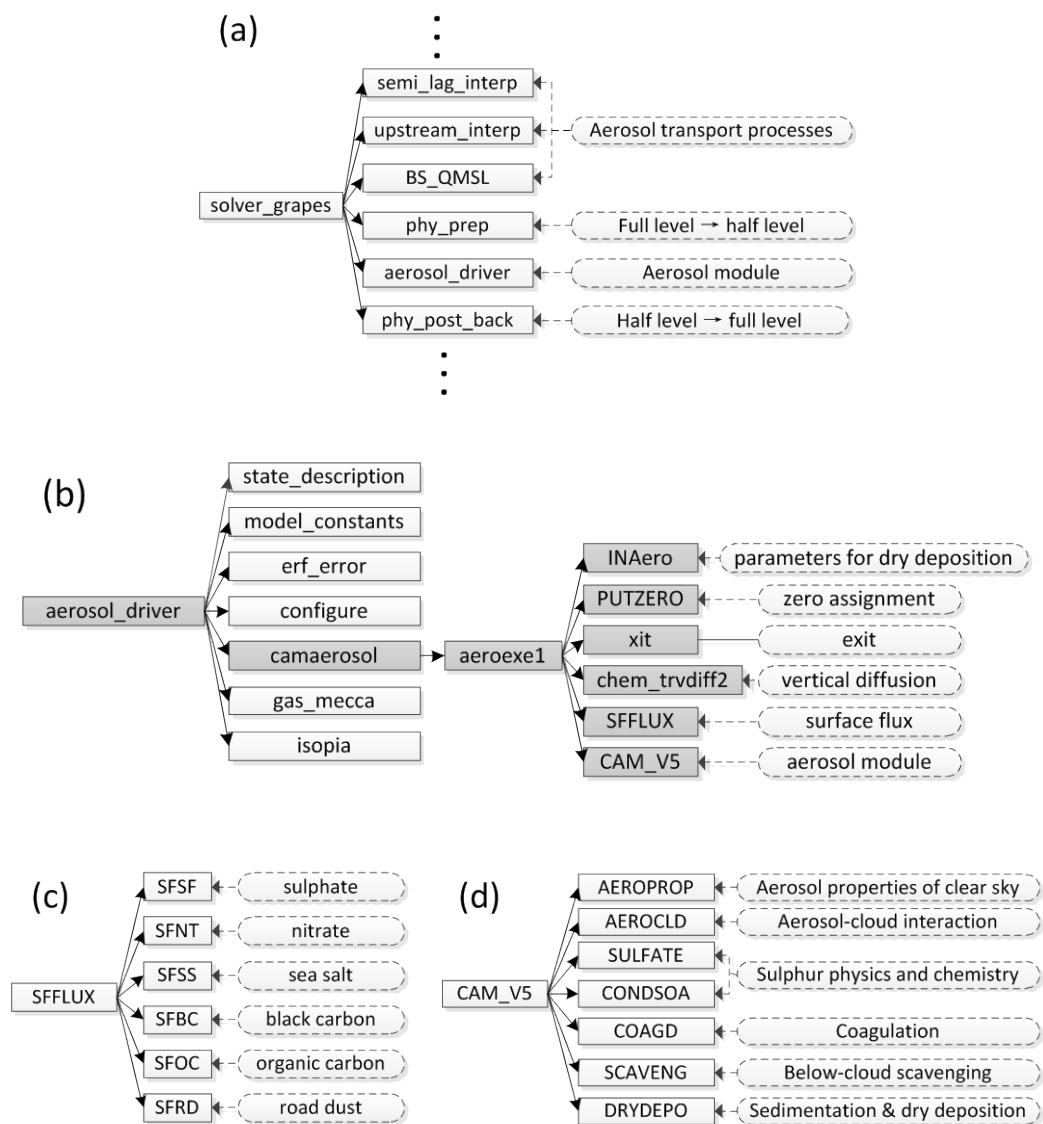

Figure S1 Structure of GRAPES-CUACE aerosol model. Dashed boxes are descriptions of each subroutine.

(a) Aerosol transport processes and the aerosol module main interface; (b) Shaded are interface subroutines (`aerosol_driver`, `module_ae_cam` and `aeroexe1`) and CAM; (c) Surface fluxes calculation module; (d) The aerosol physical and chemical processes section.

## 2. Structures of the CUACE aerosol adjoint model

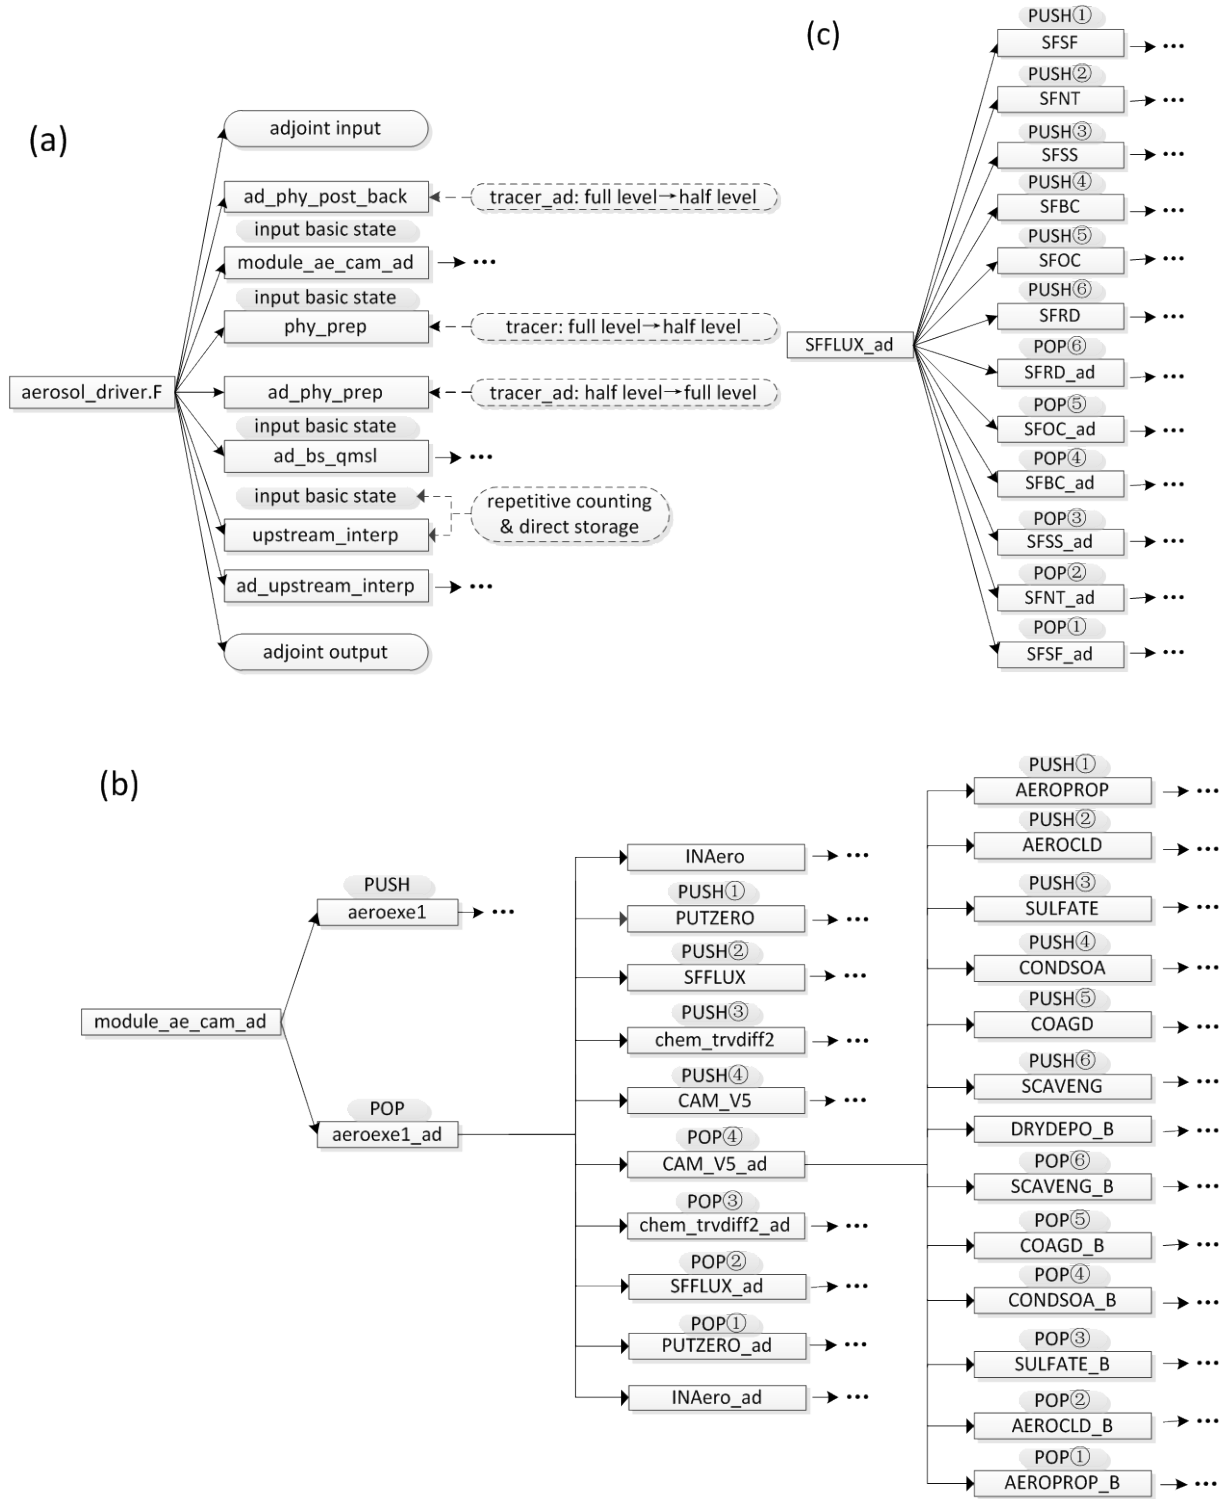

Figure S2 Structure of the adjoint of GRAPES-CUACE aerosol model. (a): The adjoint structure of Fig. 1 (a); (b)The adjoint structure of Fig. 1 (b) and (d); (c): The adjoint structure of Fig. 1 (c).

In the GRAPES-CUACE aerosol model, 'aerosol\_driver' is the main interface subroutine that connect GRAPES-Meso and CUACE. Both 'aerosol\_driver' and the aerosol transport process subroutines are called by 'solver\_grapes' (Figure 1(a)).

However, in developing the adjoint of CUACE aerosol model, ‘aerosol\_driver’ acts as the main program. Aerosol transport processes, full and half level interpolation subroutines (‘ad\_phy\_prep’ and ‘ad\_phy\_post’) and the aerosol physics and chemical processes are all subroutines of ‘aerosol\_driver’ (Figure 2 (a)).

The unequilibrated variables are saved in checkpoint files at the beginning of each external time step during the forward integration. While for saving intermediate unequilibrated variables, recalculation and stack storage (PUSH & POP) schemes are adopted. This type of two-level checkpointing strategy is similar to that used in the adjoint of GEOS-Chem and has been shown to optimally balance storage, memory and CPU requirements (Sandu et al., 2005; Henze et al., 2007).

### 3. Forward and adjoint codes example

Followings are two pieces of code from coagd.F (section 3.1; coagulation process) and coagd\_ad.F (section 3.2; the adjoint of coagulation processes). In section 3.2, recalculation and stack storage schemes for intermediate unequilibrated variables are shown.

#### 3.1. Forward code from coagd.F:

```
DO I=1,ICOB
    DO J=I,ICOB
        DO L=1+MAE,ILEV
            DO IL=IL1,IL2

C
C      * DIFFUSION COEFFICIENTS
C
DIFFX=PDIFF(IL,L,I)
DIFFY=PDIFF(IL,L,J)
C
C      * AIR'S DYNAMIC VISCOSITY
C
        AMU=145.8*1.E-8*THROW(IL,L+1)**1.5/
1          (THROW(IL,L+1)+110.4)
DSUM=2.*(RHSIZE(IL,L,I)+RHSIZE(IL,L,J))
C
C      BROWNIAN COAGULATION COEFFICIENT          [V1, V2, VR - PARTICLE MASS, KG]
C
CBAR=SQRT(CBAR12(IL,L,I)+CBAR12(IL,L,J))
GMEAN=SQRT(GX(IL,L,I)+GX(IL,L,J))

BETA(IL,L,I,J)=6.2832*(DIFFX+DIFFY)*DSUM/(DSUM*(DSUM
1          +2.*GMEAN)+8.*(DIFFX+DIFFY)/
2          (CBAR*DSUM*STICK))
```

```

C
C      ADD GRAVITATIONAL COAGULATION
C
      BETA(IL,L,I,J)=BETA(IL,L,I,J)+0.7854*DSUM**2
      1      *ABS(PDEPV(IL,L,I)-PDEPV(IL,L,J))
BETA(IL,L,J,I)=BETA(IL,L,I,J)
      END DO
      END DO
      END DO
END DO

```

### 3.2. Corresponding adjoint code from coagd\_ad.F:

```

C
C      * DIFFUSION COEFFICIENTS
C
diffx = pdiff(il, l, i)
diffy = pdiff(il, l, j)
C
C      * AIR'S DYNAMIC VISCOSITY
C
dsum = 2.*(rhsiz(il, l, i)+rhsiz(il, l, j))
      CALL PUSHREAL8(cbar)
C
C      BROWNIAN COAGULATION COEFFICIENT      [V1, V2, VR - PARTICLE MASS, KG]
C
cbar = SQRT(cbar12(il, l, i) + cbar12(il, l, j))
      CALL PUSHREAL8(gmean)
gmean = SQRT(gx(il, l, i) + gx(il, l, j))
C
beta(il, l, i, j) = 6.2832*(diffx+diffy)*dsum/(dsum/(
+      dsum+2.*gmean)+8.*(diffx+diffy)/(cbar*dsum*stick))
      IF (pdepv(il, l, i) - pdepv(il, l, j) .GE. 0.) THEN
      CALL PUSHREAL8(abs0)
abs0 = pdepv(il, l, i) - pdepv(il, l, j)
      CALL PUSHCONTROL1B(0)
      ELSE
      CALL PUSHREAL8(abs0)
abs0 = -(pdepv(il, l, i)-pdepv(il, l, j))
      CALL PUSHCONTROL1B(1)
      END IF
C
C      ADD GRAVITATIONAL COAGULATION

```

C

```
beta(il, l, i, j) = beta(il, l, i, j) + 0.7854*dsum**2*  
+ abs0
```

```
tmp = beta(il, l, i, j)
```

```
beta(il, l, j, i) = tmp
```

```
ENDDO
```

```
ENDDO
```

```
ENDDO
```

```
CALL PUSHINTEGER4(ad_from)
```

```
ENDDO
```

```
DO i=icob,1,-1
```

```
CALL POPINTEGER4(ad_from)
```

```
DO j=icob,ad_from,-1
```

```
DO l=ilev,1+mae,-1
```

```
DO il=il2,il1,-1
```

```
tmpb = betab(il, l, j, i)
```

```
betab(il, l, j, i) = 0.0
```

```
betab(il, l, i, j) = betab(il, l, i, j) + tmpb
```

```
dsum = 2.*(rhsiz(il, l, i)+rhsiz(il, l, j))
```

```
dsumb = abs0*0.7854*2*dsum*betab(il, l, i, j)
```

```
abs0b = 0.7854*dsum**2*betab(il, l, i, j)
```

```
CALL POPCONTROL1B(branch)
```

```
IF (branch .EQ. 0) THEN
```

```
CALL POPREAL8(abs0)
```

```
pdepvb(il, l, i) = pdepvb(il, l, i) + abs0b
```

```
pdepvb(il, l, j) = pdepvb(il, l, j) - abs0b
```

```
ELSE
```

```
CALL POPREAL8(abs0)
```

```
pdepvb(il, l, j) = pdepvb(il, l, j) + abs0b
```

```
pdepvb(il, l, i) = pdepvb(il, l, i) - abs0b
```

```
END IF
```

```
diffx = pdiff(il, l, i)
```

```
diffy = pdiff(il, l, j)
```

```
temp8 = stick*cbar*dsum
```

```
temp7 = (diffx+diffy)/temp8
```

```
temp6 = dsum + 2.*gmean
```

```
temp5 = dsum/temp6 + 8.*temp7
```

```
temp5b = 6.2832*betab(il, l, i, j)/temp5
```

```
temp5b0 = -((diffx+diffy)*dsum*temp5b/temp5)
```

```
temp6b = -(dsum*temp5b0/temp6**2)
```

```
temp7b = 8.*temp5b0/temp8
```

```
temp8b = -(temp7*temp7b)
```

```
diffxb = temp7b + dsum*temp5b
```

```

diffyb = temp7b + dsum*temp5b
dsumb = dsumb + stick*cbar*temp8b + temp6b + temp5b0/
      +      temp6 + (diffx+diffy)*temp5b
gmeanb = 2.*temp6b
cbarb = dsum*stick*temp8b
betab(il, l, i, j) = 0.0
      CALL POPREAL8(gmean)
      IF (gx(il, l, i) + gx(il, l, j) .EQ. 0.0) THEN
temp5b1 = 0.0
      ELSE
temp5b1 = gmeanb/(2.0*SQRT(gx(il, l, i)+gx(il, l, j)))
      END IF
gxb(il, l, i) = gxb(il, l, i) + temp5b1
gxb(il, l, j) = gxb(il, l, j) + temp5b1
      CALL POPREAL8(cbar)
      IF (cbar12(il, l, i) + cbar12(il, l, j) .EQ. 0.0) THEN
temp5b2 = 0.0
      ELSE
temp5b2 = cbarb/(2.0*SQRT(cbar12(il, l, i)+cbar12(il,
      +      l, j)))
      END IF
cbar12b(il, l, i) = cbar12b(il, l, i) + temp5b2
cbar12b(il, l, j) = cbar12b(il, l, j) + temp5b2
rsizeb(il, l, i) = rsizeb(il, l, i) + 2.*dsumb
rsizeb(il, l, j) = rsizeb(il, l, j) + 2.*dsumb
pdiffb(il, l, j) = pdiffb(il, l, j) + diffyb
pdiffb(il, l, i) = pdiffb(il, l, i) + diffxb
ENDDO
ENDDO
ENDDO
ENDDO

```

## References:

Sandu, A., Daescu, D., Carmichael, G. R., and Chai, T.:Adjoint sensitivity analysis of regional air quality models, J., Comput. Phys., 204, 222-252, 2005a.

Henze, D., Hakami, A., and Seinfeld, J.: Development of the adjoint of GEOS-Chem, Atmos. Chem. Phys., 7, 2413-2433, 2007.
